# Supplementary material for: Ocean Alkalinity Enhancement Through Blue Carbon Ecosystem Restoration
Source: Research Square preprint supplement (doi:10.21203/rs.3.rs-1982110/v1), 2022-08-29
Supplement: Supplementary file 1 [file f4d7d30a8b717da807358138.docx]

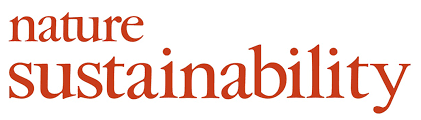


**Brief Communication**

Supplementary Information for

**Ocean Alkalinity Enhancement Through Blue Carbon Ecosystem Restoration**

M. Fakhraee1, N.J. Planavsky1, C.T. Reinhard2

Correspondence to: [mojtaba.fakhraee@yale.edu](mailto:mojtaba.fakhraee@yale.edu); [noah.planavsky@yale.edu](mailto:noah.planavsky@yale.edu)

**Time-dependent sediment diagenesis model:**

To assess the potential of mangroves and seagrasses in capturing carbon, we constructed a time-dependent diagenetic model. The vertical distributions of chemical species in solute and solid phase within the sediment column can be expressed using the following diagenetic equation.

Solute:

(1)

Solid:

(2)

Here, *x* is depth below the sediment water surface, *Ci* is the concentration of species *i*, *Di* and *Db* are, respectively, the corresponding molecular diffusion, and bio-diffusion coefficients. The parameters *u* and *v* are burial velocity for solid and dissolved (advective) species. The parameter *αirr* denote the bio-irrigation coefficient. The parameter *ψ* is *(1-φ)ρ*, where *φ*, *ρ* are, respectively, the sediment porosity, and density of dry sediment. *Rij* correspond to the sum of all the rates of reactions that consume or produce species *i*. The details of the reactions along with their rate expressions are presented in Tables S1 & S2. Model parameter values are listed in Table S3.

The rate of organic matter degradation was a function of abundance and reactivity of organic matter:

*RC = k [OC]* (3)

Here *RC* denotes the rate of organic matter degradation, “*k*” is the reactivity of organic matter, and [OC] is the concentration of organic matter. Following the previous studies, the reactivity, *k*, was described by the Middelburg power law as a function of carbon age *t: log10 k = - (0.95) log10 t – (0.81*)1. This power law was corrected for the effect of oxygen which we used in the model and shown to hold over a range of conditions2. The rate of dissolved inorganic carbon production was assumed to be equal to the rate of organic matter degradation (*RDIC = RC*). The rate of alkalinity production in the sediment was controlled by the total rate of anaerobic respiration (e.g., sulfate reduction, and dissolution and precipitation of calcium carbonate. The pH depth profile in the model was obtained by using a function that calculates the different species in the carbonate system using two known dissolved species of DIC and alkalinity 3.

**Rootzone fluxes:**

Similar to the previous works, the release flux of oxygen, and dissolved organic carbon (DOC) in porewater were parameterized assuming they are dispersed in a Brownian fashion with a Gaussian probability distribution (e.g.,4).

(4)

Here *j* denotes the index for each gridpoint, *µ* is the gridpoint in the center of the rootzone and *2σ* regulates the number of gridpoints over which the release of oxygen and DOC happens. The release rate of oxygen and DOC at each grid point would be calculated as:

(5)

where *Fi* is the total flux of oxygen and DOC taken from the previous studies and were also varied to calibrate the measured profiles of different chemical species in seagrasses and mangroves, and *Δx* is the length between two consecutive gridpoints.

**Boundary and initial conditions:**

The boundary conditions at the sediment–water interface was considered as concentration of dissolved species (Dirichlet):

(6)

and imposed flux (mixed-type) for the solid species:

(7)

Here, *Fi* is the solid substance flux at the sediment–water interface. A zero gradient (Neumann or second-type) A no-gradient boundary condition is imposed for all species at the bottom of the domain (*x = L*):

(8)

The initial conditions for all the species were considered zero at the time zero. To explore the effect of seagrass and mangrove addition to the depth profiles of chemical species, we imposed depth profiles of chemical species in the case of no seagrass and mangroves when they reach steady-state as initial conditions for the case of mangroves and seagrasses.

**Model verification and calibration:**

We gauged model performance against by comparing to measured depth profiles of chemical species in seagrass and mangrove ecosystems. Specifically, the model was able to successfully capture the observed trend in the depth profiles of oxygen, dissolved inorganic carbon (DIC), alkalinity (ALK), and pH in a seagrass site in the Bahamas5 with limited calibration. The depth profiles were reproduced for both cases of with and without seagrass. We also compared the model against to measurements made in two mangrove sites6,7. We also reproduced the depth profiles of oxygen, sulfide, pH, and total organic carbon (TOC) in two different mangrove sites. The organic matter flux from mangroves and seagrasses (rootzone fluxes) is variable and was the only parameter tuned to modern profiles. However, the utilized values are within the reported ranges. The results of the calibration for both seagrass and mangrove sites are presented in figures S1-S3.

**Sensitivity analysis:**

While the results presented in the manuscript were obtained from a stochastic analysis, we further investigated the impact that each parameter has on the benthic flux of alkalinity. Precisely, we conducted a sensitivity analysis in which the model parameters were varied within the range specified in Table S2, and changes in the alkalinity benthic flux between maximum and minimum of each parameter were recorded. To be able to compare the effect of each parameter on the alkalinity benthic flux, the response of the model to change in input parameters were normalized (Figure. S4). Sign of the normalized effect indicate the directionality of the effect of each parameter on the alkalinity benthic flux with positive normalized effect representing an increase in the parameter value would lead to an increase in the alkalinity flux while a negative normalized effect shows that an increase in the parameter would result in a decrease in the alkalinity flux.

Our results indicate, that diffusive flux of alkalinity from the sediment is insensitive to most of the model input parameters (between -0.1 to 0.1) such length of the integration domain (*Lmax*), bioturbation coefficient (*Db*), burial velocity (*u*), advective velocity (*v*), reactivity of organic matter at the sediment water interface (*ageinit*), half saturation constants of oxygen, sulfate, DOC, and ferric iron (*kO2, kSO4, kDOC, kFe(III)*), molecular diffusion coefficients of sulfate, sulfide, DOC, and bicarbonate (*DSO4, DH2S, DDOC, DHCO3*), and rate constants for dissolution of calcium carbonate, sulfide oxidation, iron sulfide formation, and iron oxidation (*kcal,2, kHSOX, kFeS, kFeOX*). The parameters with the strongest leverage on the diffusive flux of alkalinity from the sediment were the strength of net primary production (*NPP*), bio-irrigation coefficient (*αirr*), and molecular diffusion coefficient of oxygen (*DO2*). Notably, an increase in the NPP would result in an increase in the rate of aerobic respiration, which in turn, would decrease the depth of oxygen penetration. The decreased oxygen penetration depth allows for higher amount of organic matter to reach anoxic depths which would result in higher rate of anaerobic respiration and higher production of alkalinity from anaerobic respiration. Higher values of bio-irrigation coefficient imply a more efficient bio-irrigation. Higher mixing would result in a less sharp gradient of dissolved chemical species including bicarbonate which would result in a smaller flux of dissolved species from the sediment. Higher values of oxygen molecular diffusion coefficient would increase the dispersion of molecular oxygen in porewater which would then result in a deeper oxygen penetration depth. Increase in the depth of oxygen penetration would decrease the amount of organic matter delivered to depth in the sediment. This effect would in turn result in a lower rate of anaerobic respiration and alkalinity production.

**Surface ocean response to benthic alkalinity enhancement:**

A given benthic alkalinity flux stimulated by mangrove or seagrass restoration will be imperfectly translated into an increased air-sea flux of CO2 because of the buffering capacity of surface ocean waters 8–11. The magnitude of this effect is governed by the thermodynamics of the carbonic acid system (and thus seawater temperature and salinity), together with the existing state variables of the carbonic acid system at a given location. To estimate the impact of this effect, we define a response factor for CO2 removal (dCO2) as a function of changing alkalinity (dALK) 8:

where *S* and *T* denote *in-situ* salinity and temperature, respectively, and *p*CO2 denotes the partial pressure of atmospheric carbon dioxide. We use surface ocean temperature and salinity data from the World Ocean Atlas 201812 (Fig. S5) to estimate equilibrium response factors for the global surface ocean (Fig. S6), assuming a constant atmospheric *p*CO2 of 400 ppmv. The latter assumption is conservative for our purposes in that higher *p*CO2 values (e.g., current and future atmospheric *p*CO2) will lead to higher response factors and more effective communication between benthic alkalinity fluxes and air-sea CO2 uptake at equilibrium. According to this framework response factors vary throughout the surface ocean between ~0.8 – 0.9, with systematically lower values in the tropics and subtropics relative to temperature and polar regions (Fig. S6, S7). This bimodal pattern is a predictable result of latitudinal variation in temperature, and to a secondary extent salinity. In our analysis, we apply a conservative correction to estimate rates of CDR based on benthic alkalinity enhancement ranging between 15 – 25% (e.g., response factors between 0.75 – 0.85), consistent with the observed range of response factors for the tropical/subtropical ocean.

**References:**

1. Middelburg, J. J. A simple rate model for organic matter decomposition in marine sediments. *Geochimica et Cosmochimica Acta* **53**, 1577–1581 (1989).

2. Katsev, S. & Crowe, S. A. Organic carbon burial efficiencies in sediments: The power law of mineralization revisited. *GEOLOGY* **43**, (2015).

3. Zeebe, R. E. & Wolf-Gladrow, D. A. CO2 in seawater : equilibrium, kinetics, isotopes. 346.

4. Eldridge, P. M. & Morse, J. W. A diagenetic model for sediment–seagrass interactions. *Marine Chemistry* **70**, 89–103 (2000).

5. Burdige, D. J., Zimmerman, R. C. & Hu, X. Rates of carbonate dissolution in permeable sediments estimated from pore-water profiles: The role of sea grasses. *Limnology and Oceanography* **53**, 549–565 (2008).

6. Brodersen, K. E. *et al.* Oxygen consumption and sulfate reduction in vegetated coastal habitats: Effects of physical disturbance. *Front Mar Sci* **6**, 14 (2019).

7. Zhou, Y. wu, Zhao, B., Peng, Y. sheng & Chen, G. zhu. Influence of mangrove reforestation on heavy metal accumulation and speciation in intertidal sediments. *Marine Pollution Bulletin* **60**, 1319–1324 (2010).

8. Renforth, P. & Henderson, G. Assessing ocean alkalinity for carbon sequestration. *Reviews of Geophysics* **55**, 636–674 (2017).

9. Egleston, E. S., Sabine, C. L. & Morel, F. M. M. Revelle revisited: Buffer factors that quantify the response of ocean chemistry to changes in DIC and alkalinity. *Global Biogeochemical Cycles* **24**, (2010).

10. Frankignoulle, M. A complete set of buffer factors for acid/base CO2 system in seawater. *Journal of Marine Systems* **5**, 111–118 (1994).

11. REVELLE, R. & SUESS, H. E. Carbon Dioxide Exchange Between Atmosphere and Ocean and the Question of an Increase of Atmospheric CO2 during the Past Decades. *Tellus* **9**, 18–27 (1957).

12. World Ocean Atlas 2018. https://www.ncei.noaa.gov/access/metadata/landing-page/bin/iso?id=gov.noaa.nodc:NCEI-WOA18.

13. Canfield, D. E. Models of oxic respiration, denitrification and sulfate reduction in zones of coastal upwelling. *Geochimica et Cosmochimica Acta* **70**, 5753–5765 (2006).

14. Burdige, D. J. Preservation of organic matter in marine sediments: Controls, mechanisms, and an imbalance in sediment organic carbon budgets? *Chemical Reviews* **107**, 467–485 (2007).

15. Katsev, S., Rancourt, D. G. & L’Heureux, I. dSED: A database tool for modeling sediment early diagenesis. *Computers and Geosciences* **30**, 959–967 (2004).

16. Adkins, J. F., Naviaux, J. D., Subhas, A. v., Dong, S. & Berelson, W. M. The Dissolution Rate of CaCO 3 in the Ocean. *Annual Review of Marine Science* **13**, 57–80 (2021).

17. Subhas, A. v. *et al.* Shallow Calcium Carbonate Cycling in the North Pacific Ocean. *Global Biogeochemical Cycles* **36**, e2022GB007388 (2022).

**Supplementary Tables:**

| **Reaction** | **Rate** |
| --- | --- |
| CH2O + O2 ⇒ CO2 + H2O | *RO2* |
| CH2O + 4 FeOOH(s) + 7CO2 + H2O ⇒ 4Fe2+ + 8 HCO3– | *RFeOOH* |
| SO42- + 2CH2O ⇒ H2S + 2HCO3 | *RSR* |
| H2S + 2O2 + 2HCO3- ⇒ SO42- + 2CO2 + 2H2O | *RSOX* |
| R-O-PO4 + H2O ⇒ PO4 + R-OH2 | *RPSO4* |
| Fe2+ + HS–  ⇒ FeS(s) + H+ | *RFeS* |
| Ca2+ + 2 HCO3– ⇒ CaCO3 + CO2 + H2O | *Rcal* |

**Table S1.** Reactions included in the model.

**Table S2.** Kinetics of the reactions included in the model.

| **Reaction** | **Rate expression** |
| --- | --- |
| Sulfide Oxidation |  |
| Aerobic Respiration |  |
| Iron Reduction |  |
| Sulfide Precipitation |  |
| Sulfate Reduction |  |
| Calcite precipitation | *f(x)* = 1 when *Ω* > 1 and,  *f(x)* = 0 for *Ω* ≤ 1 |
| Calcite precipitation | *f(x)* = 1 when *Ω* < 1 and,  *f(x)* = 0 for *Ω* ≥ 1 |

**Table S3.** Parameters in the reactive transport model.

| **Parameter** | **Symbol** | **Value** | **Unit** | **Range used in stochastic simulation** | **Ref.** |
| --- | --- | --- | --- | --- | --- |
| Diffusion coefficient of sulfate | DSO4 | 300 | cm2 yr-1 | 200-400 | 13 |
| Diffusion coefficient of sulfide | DH2S | 300 | cm2 yr-1 | 400-600 | 14 |
| Diffusion coefficient of oxygen | DO2 | 300 | cm2 yr-1 | 300-500 | 14 |
| Diffusion coefficient of dissolved inorganic carbon (DOC) | DDOC | 300 | cm2 yr-1 | 300-500 | 14 |
| Sulfide oxidation rate constant | kHSOX | 500 | uM-1yr-1 | 100-1000 | 15 |
| FeS precipitation rate constant | kFeS | 10-5 | mol g-1 yr-1 | 10-6-10-5 | 15 |
| Monod constant for SO42- reduction | kSO4 | 20 | uM | 10-100 | 15 |
| Monod constant for O2 (inhibition constant) | kO2 | 2 | µM | 0.5 – 2 | 15 |
| Monod constant for FeOOH reduction | kFe(III) | 20 | µmol/g | 10-50 | 15 |
| Sulfate at SWI (sediment water interface) | [SO42-] | 28000 | µM | - | - |
| Sulfide concentration at SWI | [H2S] | 0 | µM | - | - |
| Oxygen concentration at SWI | [O2] | 220 | µM | - | - |
| Density of dry sediment | ρs | 2.7 | g/cm3 | - | - |
| Burial velocity | Vburial | 0.1 | cm yr-1 | 0.05-0.2 | - |
| Initial age of organic carbon | ageinit | 0.1 | yr | - | - |
| Calcite dissolution rate constant | *kcal,2* | 0.005 | yr-1 | 0.001-0.01 | 16,17 |

**Supplementary Figures:**

**Figure S1.** Results of the model validation against measurement in a Seagrass. The model captures the observed trend in the depth profiles of oxygen, DIC, alkalinity, and pH across two sites in the Bahamas 5.

**Figure S2.** Results of the model validation against measurement in a mangrove forest, Sydney area, Australia6.

**Figure S3.** Results of the model validation against measurement in a mangrove forest, southeastern China7.

**
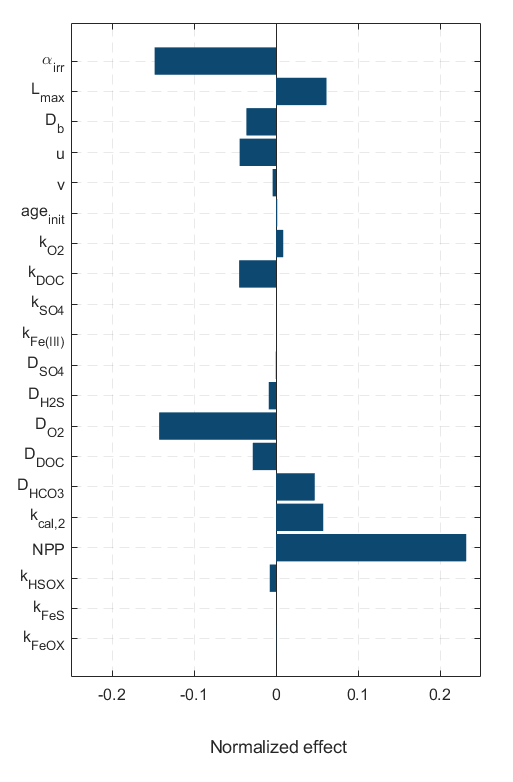
**

**Figure S4.** Results of the sensitivity analysis of the diffusive flux of alkalinity to the inputs of the time-dependent sediment diagenesis model. For easier comparison, the change in the alkalinity diffusive flux in response to a change in the model parameters was normalized.

**Figure S5.** Surface ocean temperature (left) and salinity (right) data from the World Ocean Atlas 2018 (WOA2018).

**Figure S6.** Surface ocean response factors (dCO2/dALK) based on WOA2018 temperature and salinity data.

**Figure S7.** Distributions of surface ocean response factors (dCO2/dALK) separated by latitude, showing values for tropical/subtropical latitudes (40ºN – 40ºS; red), southern temperature/austral/polar latitudes (40ºS – 90ºS; grey), and northern temperate/boreal/polar latitudes (40ºN – 90ºN; purple). Results shown in the *Main Text* assume a conservative range for the tropical/subtropical ocean of 0.75 – 0.85.
